# Supplementary material for: Prelamin A mediates myocardial inflammation in dilated and HIV-associated cardiomyopathies
Source: JCI journal article supplement (doi:10.1172/jci.insight.126315), 2019-10-17

1 **Supplemental Materials for**

2 **‘Prelamin A mediates myocardial inflammation in dilated and HIV associated**  
3 **cardiomyopathies’**

4 **Authors:** Daniel Brayson, PhD<sup>1</sup>; Andrea Frustaci, MD<sup>2,3</sup>; Romina Verardo, PhD<sup>3</sup>; Cristina Chimenti,  
5 MD PhD<sup>2,3</sup>; Matteo Antonio Russo, MD<sup>4</sup>; Robert Hayward, BSc<sup>1</sup>; Sadia Munir Ahmad, MSc<sup>1</sup>; Gema  
6 Vizcay-Barrena, PhD<sup>5</sup>, Andrea Protti, PhD<sup>6</sup>; Peter S. Zammit, PhD<sup>7</sup>, Cristobal G. dos Remedios,  
7 PhD<sup>8</sup>; Elisabeth Ehler, PhD<sup>1,7</sup>; Ajay M. Shah, MD<sup>1</sup>; Catherine M. Shanahan, PhD<sup>1</sup>

8 **Addresses:**

9 <sup>1</sup>School of Cardiovascular Medicine and Sciences, King's College London BHF Centre for Research  
10 Excellence, London, UK

11 <sup>2</sup>Department of Cardiovascular, Nefrologic, Anesthesiologic and Geriatric Sciences, La Sapienza  
12 University of Rome, Italy.

13 <sup>3</sup>National Institute for Infectious Diseases IRCCS ‘L. Spallanzani’, Rome, Italy

14 <sup>4</sup>MEBIC Open University San Raffaele and IRCCS San Raffaele Pisana, Laboratory of Molecular  
15 and Cellular Pathology, Milan, Italy

16 <sup>5</sup>Centre for Ultrastructural Imaging, Guy’s Campus, King’s College London, London, UK

17 <sup>6</sup>Department of Imaging, Lurie Family Imaging Center, Center for Biomedical Imaging in  
18 Oncology, Dana-Farber Cancer Institute, Harvard Medical School, Boston, Massachusetts, USA,

19 <sup>7</sup>Randall Centre for Cell and Molecular Biophysics, King's College London, UK

20 <sup>8</sup>Department of Anatomy, Bosch Institute, University of Sydney, Sydney, NSW, Australia

21 **Working Title:** Brayson et al., Accumulation of prelamin A in cardiomyopathy

22 **Address for correspondence:** 3<sup>rd</sup> Floor James Black Centre

23 125 Coldharbour Lane

24 King’s College London

25 London SE5 9NU

26 **Telephone:** +442078485223

27 **Email:** daniel.brayson @kcl.ac.uk

28

## 1 **Supplemental Methods**

### 2 **Morphometry**

3 Mice were subjected to observation and weighed regularly. When it became apparent that the  
4 phenotype of the csPLA-Tg mice was failure to thrive and premature death, it was decided that when  
5 the weight of a mouse fell below 85% of its FLctrl littermates, it was deemed to be suffering the  
6 maximum threshold of pain permitted on the project license and was culled. Post-mortem  
7 morphometry analysis was performed using heart weight and tibia length.

### 8 **Indirect immunofluorescence of cryopreserved tissue**

9 Tissue was removed from storage at -80°C and warmed to -20°C for approximately 1 hour. Tissue  
10 was then mounted onto the stage of a cryostat with OCT compound and allowed to equilibrate to the  
11 ambient temperature of the cryostat for 5 min; for cutting heart tissue, the stage temperature was set to  
12 -22°C and the knife was set to -20°C. The sections were then cut to 10 µm thick and mounted onto  
13 high quality polylysine or superfrost slides. The sections were allowed to air dry for approximately 1  
14 hour and then stored at -80°C. For staining, sections were allowed to dry completely and fixed by  
15 immersion, in a Coplin jar, in pre-chilled 100% methanol at -20°C for 5 min or 4% formalin for 10  
16 min RT. Sections were washed 2x5 min in PBS. Sections were permeabilised in 0.5% NP-40 for 3  
17 min RT and washed 3x5 min in PBS. Sections were blocked in 3% serum originating from a species  
18 to which the antibody was not raised against for 1 hour RT. Primary antibody was diluted  
19 appropriately in blocking solution applied to the sections and incubated in a humidified chamber  
20 overnight at 4°C. Sections were washed 3x5 min in PBS and secondary antibody conjugated to a  
21 fluorophore was diluted as appropriate, applied to the sections and incubated in the dark in a  
22 humidified chamber for 1 hour RT. DAPI was added 1:10,000 for 5 min at the end of the incubation  
23 for visualisation of nucleic structures. Sections were washed 3x5 min in PBS in the dark and then  
24 mounted in mowiol mounting media and allowed to dry in the dark overnight. Source of antibodies  
25 dilutions can be found in Supplemental Table 3.

26

## 1 **Microscopy**

2 Immunohistochemical and general tissue staining was analysed by bright-field light microscopy using  
3 an Axioskop 2 microscope (Carl Zeiss MicroImaging, NY). Immunofluorescence was analysed using  
4 wide-field fluorescence microscopy (IX81 microscope, Olympus). Where images captured were  
5 subjected to quantitative analysis, this was performed by counting by eye, or semi automated with the  
6 use of selection and measuring tools made freely available by ImageJ software. All assays were  
7 performed at the James Black Centre, King's College London and in each case the investigator  
8 performing the analysis was blinded to group assignment. Images for publication were captured using  
9 a Leica SP5 confocal microscope (Leica Microsystems, UK). Confocal images were processed in  
10 Photoshop CS3 (Adobe) and minimal adjustments to brightness and contrast were made where  
11 necessary, e.g. when images were deemed too dark for comfortable viewing.

## 12 **Immunoblotting**

13 Cryopreserved heart tissue was homogenised by placement into a pre-liquid nitrogen cooled stainless  
14 steel chamber followed by crushing administered by a pre-liquid nitrogen cooled stainless steel rod  
15 and rubber mallet. 200 µl lysis/sample buffer (3.7 M urea, 134.6 mM Tris pH 6.8; 5.4% SDS; 2.3%  
16 NP-40; 4.45% beta-mercaptoethanol; 4% glycerol and 6 mg/100 ml bromophenolblue) was added.  
17 And frozen pellets placed into Eppendorf tubes. The tubes were heated to 85°C for 5 minutes. A  
18 chamber was prepared with an SDS gel of 10% acrylamide concentration. 20µl was then loaded into  
19 each well of the gel. The proteins were separated at 150 mV. Transfer was achieved in wet conditions.  
20 The proteins were subject to electrophoretic transfer onto PVDF membranes that had been incubated  
21 in methanol for 20 seconds and then washed in distilled water. The transfer conditions were 65 Amps  
22 at 4°C ON. The membrane was blocked for 1 hour with 5% Milk in TBS-T. Primary antibodies were  
23 added (Table 2.2) with TBS-T/5% milk or TBS-T 5% bovine serum albumin and incubated overnight  
24 at 4°C. The membrane was washed 3x5 min with TBS-T. The blots were then incubated in secondary  
25 antibody coupled to horseradish peroxidase for 1 hour at room temperature or secondary antibody  
26 conjugated to a fluorophore or horse radish peroxidase for 1 hour. The blots were again washed with

1 TBS-T and bound antibody signal was detected by an Odyssey® scanning detection system (LI-COR  
2 Biosciences, U.S.A), or by enhanced chemiluminescence substrate (ECL plus, GE Healthcare, USA)  
3 and exposure to film. Western blots were quantified using ImageStudio™ software (LI-COR  
4 Biosciences, U.S.A) and ImageJ. Immunoblotting of HIV associated cardiomyopathy tissue was  
5 performed using commercially available kit for whole-cell extraction from frozen tissue according to  
6 manufacturers instructions (Active Motif, USA, cat. no. 40010).

### 7 **Quantitative (q)-PCR**

8 2 µg RNA was diluted into 10 µl of double distilled (dd) H<sub>2</sub>O. 0.3 µl Oligo dT primer, 0.3 µl random  
9 primer and 1µl dNTPs was added to this and heated to 65°C and then cooled to 4°C in a thermocycler.  
10 4 µl 5x Buffer, 3.9 µl DEPC-treated H<sub>2</sub>O and 0.5 µl reverse transcriptase (M-MLV) was added and  
11 samples were heated in a thermocycler to 25°C for 10 min, 37°C for 50 min and cooled to 4°C. After  
12 the reaction, the samples were diluted to 100 µl total volume for qPCR. qPCR was carried out using  
13 the  $\Delta$ Ct and standard curve methods. When the  $\Delta$ Ct method was used the primers had been pre-  
14 validated and were part of a standard protocol for the lab. 9 µl cDNA was added to 10 µl 2x Sybr  
15 green PCR master mix and 5 µmol of forward and reverse primers (Supp table. 4). Cycling parameters  
16 were 94°C for 15 seconds, followed by single-step annealing and extension at 60°C for 1 min (35  
17 cycles). Reactions were carried out in a Corbett RotorGene-3000. The cycle threshold (Ct) was  
18 determined manually as an arbitrary point during the linear phase of amplification and mRNA  
19 expression was quantified as a ratio of GAPDH expression. mRNA expression of csPLA-Tg groups  
20 was expressed as fold change compared to FLctrl groups.

### 21 **Haemotoxylin and eosin staining**

22 Tissue samples were fixed in 4% PFA and dehydrated overnight. The samples were then embedded in  
23 wax blocks and cut to sections of 6 µM thickness and mounted on glass slides (superfrost plus, VWR  
24 International). Slides were baked at 60°C overnight. Tissues were then processed and rehydrated by  
25 sequential incubation in xylene and reducing concentrations of ethanol 100%, (2x3 min) 96%, 75%,  
26 50%, 25% (1 min). After rehydration, slides were left under running tap water for 10 min. After

1 rehydration, sections were washed under running tap water for 5 min, and then placed in Harris'  
2 haematoxylin solution for 5 min. The sections were then washed under running tap water until the  
3 water ran clear followed by differentiation in acid alcohol. The sections were again placed under  
4 running tap water for 5 min and then stained with eosin solution for 3 min. The sections were dunked  
5 5 times in tap water and then subjected to dehydration by sequential ethanol treatment: 25%, 50%,  
6 75%, 96% (1 min each) 100%, (2x3 min) xylene, (2x5 min). Coverslips were mounted using DPX and  
7 allowed to dry overnight.

#### 8 **Picro-sirius red staining**

9 Following rehydration, slides were left in ddH<sub>2</sub>O for 5 min followed by a 30 second incubation in  
10 0.2% phosphomolybdic acid. Slides were rinsed in ddH<sub>2</sub>O and then left in 1% Sirius red solution for  
11 90 min. Slides were washed 2x2 min in acidified ddH<sub>2</sub>O (0.05% acetic acid) followed by a 15 min  
12 incubation in Picric acid. Slides were rinsed several times in ddH<sub>2</sub>O followed by dehydration by  
13 sequential ethanol treatment: Glass coverslips were mounted with DPX and allowed to dry overnight.

#### 14 **Senescence associated $\beta$ -Galactosidase assay**

15 Hearts were resected from mice and immediately frozen and cryosectioned into 5mm thick slices and  
16 mounted onto superfrost slides. Sections were allowed to dry for 1-2 hrs. Samples were fixed in 1%  
17 formalin solution for 10 min RT. Senescence associated  $\beta$ -Galactosidase (SA- $\beta$ -Gal) staining solution  
18 was freshly made and applied to each heart section so that they were generously submerged (approx.  
19 50  $\mu$ l per heart section). The slides were incubated in a humidified chamber overnight (approx. 16h) at  
20 37°C. The slides were washed 2x5 min in PBS and once in 100% methanol for 2 min, the heart  
21 sections were then viewed and photographed under bright-field microscopy.

#### 22 **Cardiac troponin T (cTnT) Enzyme Linked Immuno-Sorbent Assay (ELISA)**

23 Cardiac puncture under terminal anaesthesia was performed and blood was collected in an EDTA  
24 coated Eppendorf and spun at 13,000 g 4°C for 15 minutes to sediment red blood cells. Plasma was

1 collected and subject to ELISA for cTnT (Elabscience, USA) according to manufacturer's  
2 instructions.

### 3 **TUNEL staining**

4 Deparaffinised sections were digested in 20 µg/ml proteinase K solution at 37°C for 10 min and  
5 washed 3x5 min in PBS. Sections were then incubated in 3% H<sub>2</sub>O<sub>2</sub> for 10 min RT to block  
6 endogenous peroxidase activity and washed 3x5 min in PBS. Sections were then pre-incubated in TdT  
7 reaction buffer for 10 min RT and then incubated in TdT reaction mixture for 1 hour at 37°C in a  
8 humidified chamber. Sections were then washed in stop wash buffer for 10 min RT and rinsed in  
9 PBS-T 3x5 min. Sections were incubated with streptavidin-HRP for 20 min RT. Sections were  
10 incubated in DAB chromagen solution for 1-10 min (until brown staining appeared) and left under  
11 running tap water for 5 min. Coverslips were mounted with DPX and allowed to dry for 2 hour or  
12 overnight (ON).

1 **Supplemental Tables**

2 **Supplemental Table 1.** Patient information for explanted DCM samples

| Random ID | Assigned ID | Sex | Age | Clinical Diagnosis | Gene  | Mutation | Ethnicity            | Diabetes | Ejection fraction (%) | Biobank centre | Nature of source             |
|-----------|-------------|-----|-----|--------------------|-------|----------|----------------------|----------|-----------------------|----------------|------------------------------|
| 2.059     | DCM01       | M   | 43  | FDCM               | NA    | NA       | NA                   | NA       | NA                    | SHB            | Explanted at transplantation |
| 4.032     | DCM02       | M   | 31  | DCM                | NA    | NA       | NA                   | NA       | NA                    | SHB            | Explanted at transplantation |
| 4.047     | DCM03       | F   | 63  | FDCM               | MYOM1 | E247K    | NA                   | NA       | NA                    | SHB            | Explanted at transplantation |
| 4.066     | DCM04       | M   | 52  | FDCM IHD           | PKP2  | I531S    | NA                   | NA       | NA                    | SHB            | Explanted at transplantation |
| S99 1036  | DCM05       | NA  | NA  | DCM                | NA    | NA       | NA                   | NA       | NA                    | Papworth       | Explanted at transplantation |
| TB11.1626 | DCM06       | M   | 45  | DCM                | NA    | NA       | White british        | No       | 15                    | Papworth       | Explanted at transplantation |
| TB11.1730 | DCM07       | M   | 41  | DCM                | NA    | NA       | White british        | No       | 8                     | Papworth       | Explanted at transplantation |
| TB12.0754 | DCM08       | M   | 43  | FDCM               | NA    | NA       | Asian british Indian | No       | NA                    | Papworth       | Explanted at transplantation |
| TB12.1094 | DCM09       | M   | 29  | DCM                | NA    | NA       | White british        | No       | NA                    | Papworth       | Explanted at transplantation |

|           |       |   |    |                                            |    |    |                  |         |    |          |                                 |
|-----------|-------|---|----|--------------------------------------------|----|----|------------------|---------|----|----------|---------------------------------|
| TB13.0359 | DCM10 | M | 24 | DCM                                        | NA | NA | White<br>british | No      | NA | Papworth | Explanted at<br>transplantation |
| TB13.0992 | DCM11 | M | 25 | DCM                                        | NA | NA | White<br>British | No      | NA | Papworth | Explanted at<br>transplantation |
| TB13.1292 | DCM12 | M | 50 | DCM,<br>NYHA calss<br>III heart<br>failure | NA | NA | Whit<br>British  | No      | NA | Papworth | Explanted at<br>transplantation |
| TB13.2060 | DCM13 | M | 42 | DCM                                        | NA | NA | White<br>British | No      | NA | Papworth | Explanted at<br>transplantation |
| TB13.2131 | DCM14 | M | 64 | DCM with<br>biventricular<br>dysfunction   | NA | NA | NA               | No      | NA | Papworth | Explanted at<br>transplantation |
| TB13.2163 | DCM15 | F | 53 | Restrictive<br>Cardiomyop<br>athy          | NA | NA | White<br>British | No      | NA | Papworth | Explanted at<br>transplantation |
| TB13.2277 | DCM16 | M | 37 | DCM                                        | NA | NA | NA               | NA      | NA | Papworth | Explanted at<br>transplantation |
| TB14.0606 | DCM17 | M | 65 | DCM with<br>RV<br>ischaemia                | NA | NA | NA               | No      | NA | Papworth | Explanted at<br>transplantation |
| TB14.1985 | DCM18 | M | 34 | DCM                                        | NA | NA | White<br>british | No      | NA | Papworth | Explanted at<br>transplantation |
| TB14.2015 | DCM19 | M | 44 | DCM                                        | NA | NA | White<br>british | Type II | NA | Papworth | Explanted at<br>transplantation |



|           |       |   |    |     |    |    |                               |         |    |          |                                 |
|-----------|-------|---|----|-----|----|----|-------------------------------|---------|----|----------|---------------------------------|
| TB15.0559 | DCM20 | F | 31 | DCM | NA | NA | Black<br>british<br>carribean | Type II | NA | Papworth | Explanted at<br>transplantation |
| TB16.0638 | DCM21 | M | 52 | DCM | NA | NA | NA                            | No      | NA | Papworth | Explanted at<br>transplantation |

1

1 **Supplemental Table 2.** Non-failing controls used in this investigation

| Random ID   | Assigned ID | Biobank centre | Nature of Source |
|-------------|-------------|----------------|------------------|
| S99 577     | NF01        | unused donor   | unused donor     |
| Ch1 5.089   | NF02        | SHB            | unused donor     |
| Ch1 5.138   | NF03        | SHB            | unused donor     |
| LV 7.004    | NF04        | SHB            | unused donor     |
| LV 7.012    | NF05        | SHB            | unused donor     |
| LV 7.060    | NF06        | SHB            | unused donor     |
| LV. 7.072   | NF07        | SHB            | unused donor     |
| LV 8.010    | NF08        | SHB            | unused donor     |
| LV NB 5.048 | NF09        | SHB            | unused donor     |
| S99 1309    | NF10        | unused donor   | unused donor     |

2 SHB = Sydney Heart Bank

3

1

2 **Supp Table 3. List of antibodies used in this investigation**

| <b>Primary Antibodies</b>   | <b>Source</b>                       | <b>Dilution (WB)</b> | <b>Dilution (IF)</b> | <b>Dilution (IHC)</b> |
|-----------------------------|-------------------------------------|----------------------|----------------------|-----------------------|
| CD3                         | Dako M7254                          | -                    | -                    | 1:20                  |
| CD45                        | Abcam ab10558                       | 1:1000               | 1:100                | -                     |
| Cleaved Caspase3            | Cell Signaling 9661                 | 1:1000               | -                    | -                     |
| Desmin                      | Dako M0760                          | 1:100                | -                    | -                     |
| Emerin                      | Leica Biosystems<br>NCL-Emerin      | 1:500                | -                    | -                     |
| GAPDH                       | Sigma-Aldrich G8795                 | 1:1000               | -                    | -                     |
| H3k9me3                     | abcam                               | -                    | -                    | 1:1000                |
| Lamin A/C (N-18)            | Santa Cruz<br>Biotechnology sc-6215 | 1:1000               | -                    | -                     |
| Myomesin B4                 | Gift C/O EE (1)                     | -                    | 1:100-200            | -                     |
| Nesprin 2 N3                | Homemade                            | 1:1000               | -                    |                       |
| $\gamma$ -H2AX              | Cell signalling 9718                | 1:1000               | 1:1000               | -                     |
| p16                         | Cell signalling 4824                |                      | -                    | 1:1000                |
| p65                         | Santa cruz<br>Biotechnology sc-372  | 1:500                | 1:200                | -                     |
| Prelamin-A (C-20)           | Santa Cruz<br>Biotechnology sc-6214 | 1:200                | 1:1000               | -                     |
| SUN 2                       | Abcam ab65447                       | 1:100                | -                    | -                     |
| <b>Secondary Antibodies</b> | <b>Source and cat number</b>        | <b>Dilution (WB)</b> | <b>Dilution (IF)</b> | <b>Dilution (IHC)</b> |
| Anti-goat Alexa fluor 488.  | Invitrogen A-11055                  | -                    | 1:1000               | -                     |
| Anti-goat Alexa fluor 568   | Invitrogen A-11057                  | -                    | 1:500                | -                     |
| Anti-mouse Alexa 488        | Invitrogen A11004                   | -                    | 1:1000               | -                     |

|                                |                                      |         |        |       |
|--------------------------------|--------------------------------------|---------|--------|-------|
| Anti-mouse Cy3                 | Jackson Laboratories<br>715-150-150  | -       | 1:1000 | -     |
| Anti-rabbit Alexa<br>fluor 488 | Invitrogen A-11011                   | -       | 1:1000 | -     |
| Biotinylated anti-<br>goat     | VECTASTAIN ABC<br>kit (see reagents) | -       | -      | 1:500 |
| IRDye 800 Anti-<br>goat        | LICOR 926-32214                      | 1:15000 | -      | -     |
| IRDye 800 Anti-<br>mouse       | LICOR 926-32210                      | 1:15000 | -      | -     |
| IRDye 800 Anti-<br>rabbit      | LICOR 926-32211                      | 1:15000 | -      | -     |
| IRDye680 Anti-<br>rabbit       | LICOR 926-68073                      | 1:15000 | -      | -     |

1

2

1 **Supp Table 4. Primers used in this investigation for qPCR experiments**

| <b>Primers</b> | <b>Sequence (5'-3')</b>                                              |
|----------------|----------------------------------------------------------------------|
| Nppa           | F—CGTGCCCCGACCCACGCCAGCATGGGCTCC<br>R—GGCTCCGAGGGCCAGCGAGCAGAGCCCTCA |
| Nppb           | F—AAGGGAGAATACGGCATCATT<br>R—ACAGCACCTTCAGGAGATCCA                   |
| Myh6           | F—CAGAGATTTCTCCAACCCAGCTGCG<br>R—AGTCAGCCATCTGGGCGTCCG               |
| Myh7           | F—AGCAGCAGTTGGATGAGCGACT<br>R—CCAGCTCCTCGATGCGTGCC                   |
| GAPDH          | F—CGTGCCGCCTGGAGAA<br>R—CCCTCAGATGCCTGCTTCAC                         |
| Ccl2           | F—TTAAAAACCTGGATCGGAACCAA<br>R—GCATTAGCTTCAGATTTACGGGT               |
| Icam1          | F—GGCATTGTTCTCTAATGTCTCCG<br>R—TGTCGAGCTTTGGGATGGTAG                 |
| Tnf            | F—CAGGCGGTGCCTATGTCTC<br>R—CGATCACCCCGAAGTTCAGTAG                    |
| Cxcl1          | F—ACTGCACCCAAACCGAAGTC<br>R—TGGGGACACCTTTTAGCATCTT                   |
| Cdkn2a (p16)   | Proprietary from Qiagen (Cat No. QT00252595)                         |
| Cdk1a (p21)    | Proprietary from Qiagen (Cat No. QT00137053)                         |

2

3

4

1 **Reference**

- 2 1. Grove BK, Kurer V, Lehner C, Doetschman TC, Perriard JC, and Eppenberger HM. A new  
3 185,000-dalton skeletal muscle protein detected by monoclonal antibodies. *The Journal of*  
4 *cell biology*. 1984;98(2):518-24.

5

# Full unedited gels for figure 1

Prelamin A

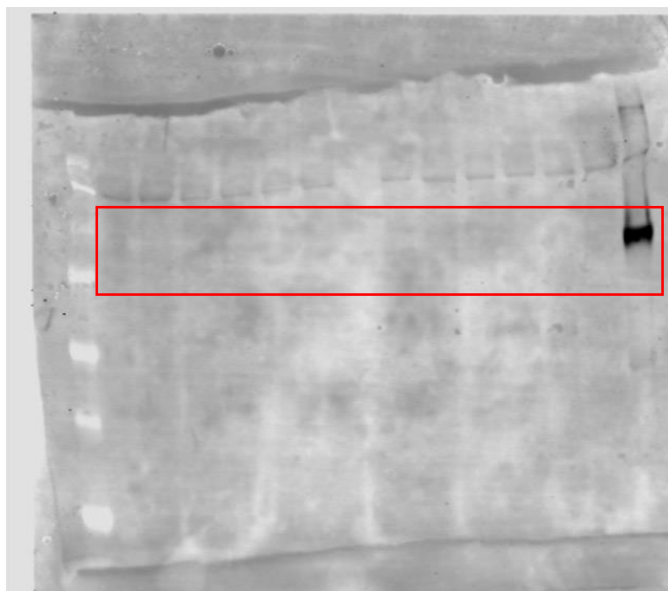

Ponceau S

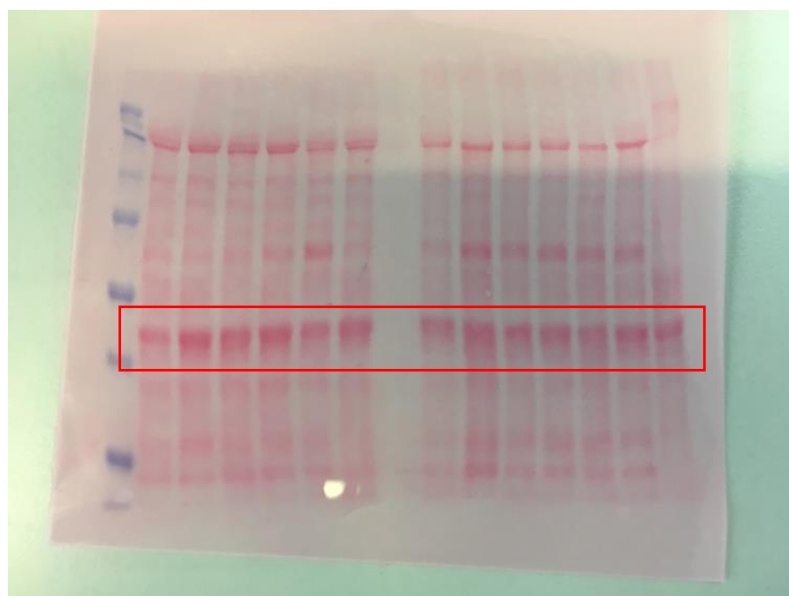

Full unedited gels for figure 2

Prelamin A

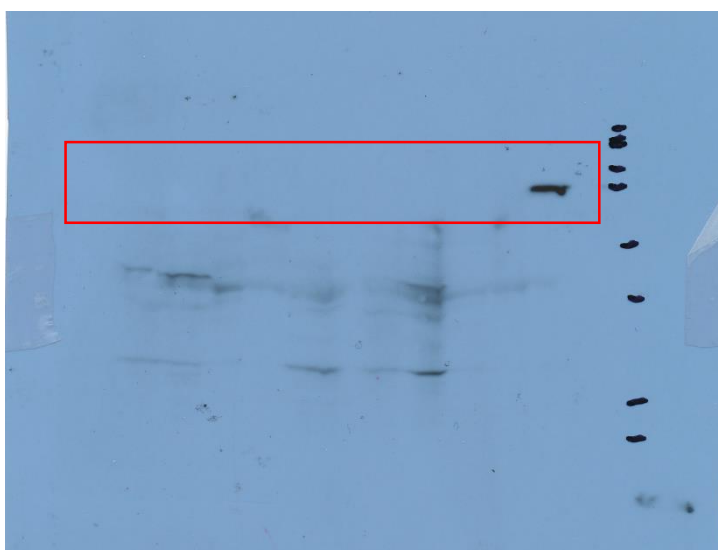

Beta actin

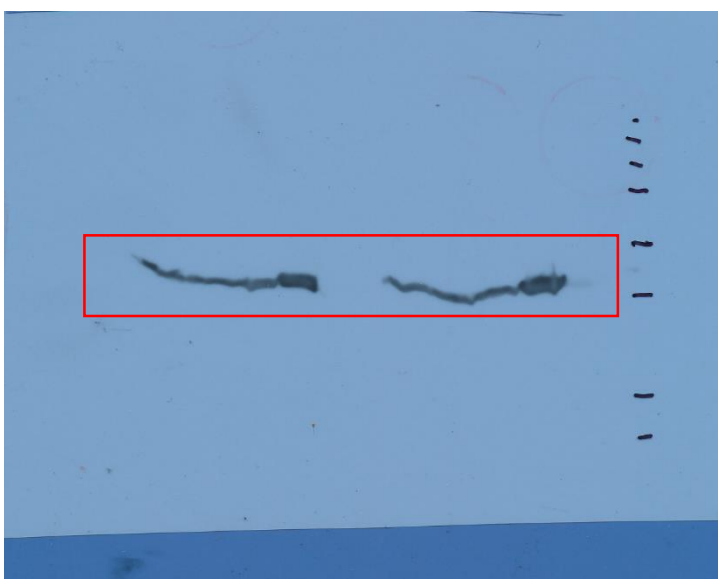



Full unedited gels for figure 3

Lamin A/C

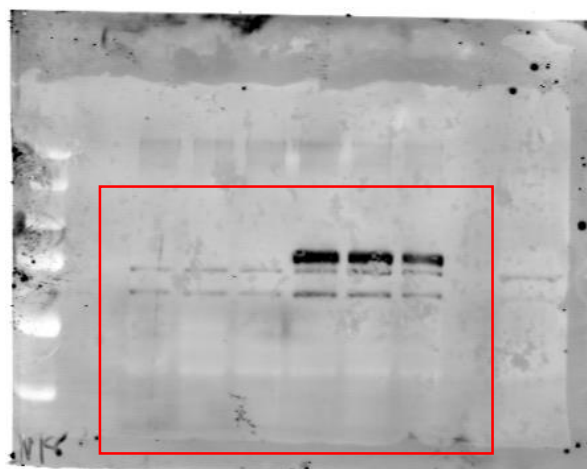

Caspase 3

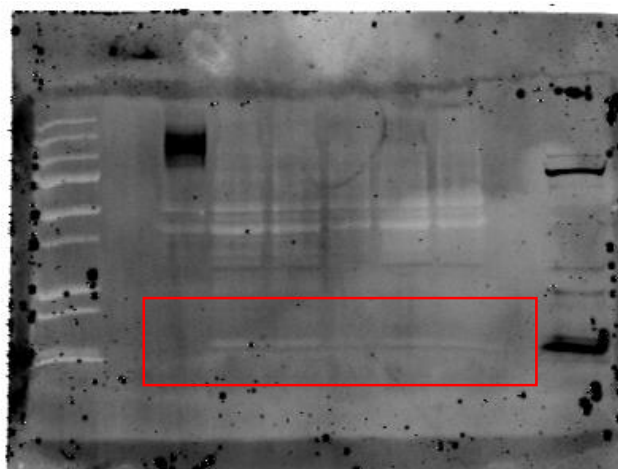

GAPDH

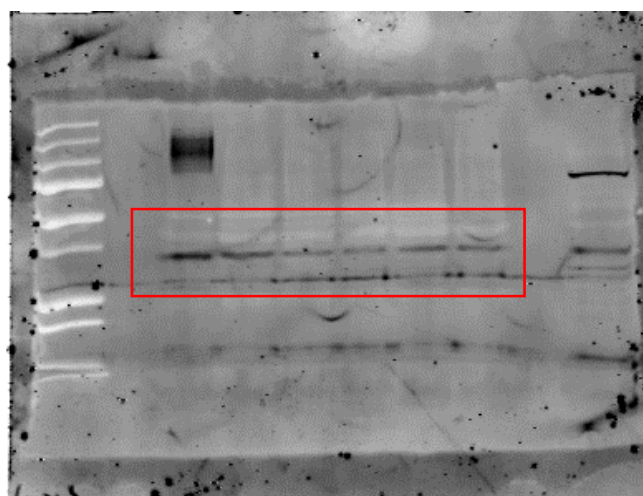

Full unedited gels for Figure 6

B.

p65  
GAPDH

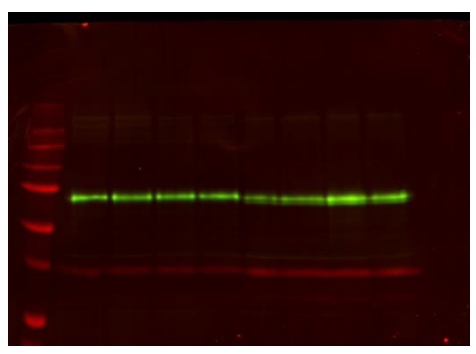

D cont...

Total  
ATM

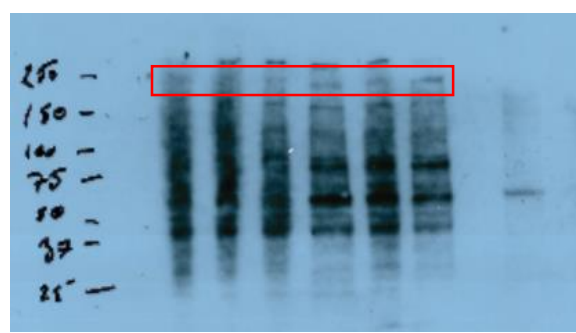

Phospho  
ATM

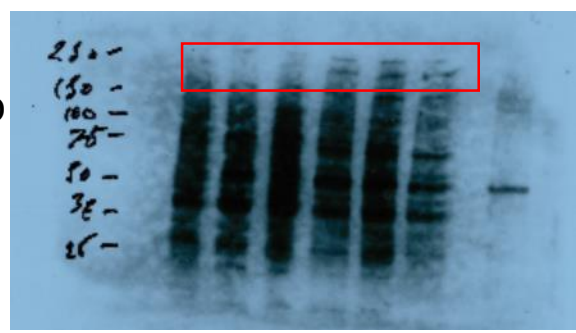

D.

p65

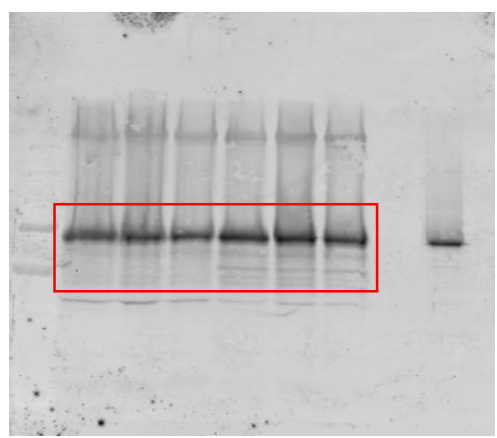

Total  
ikba

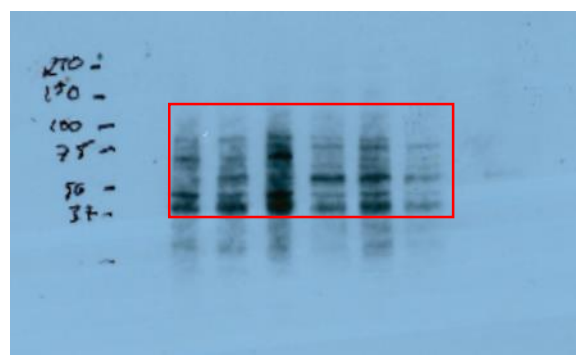

Phospho  
ikba

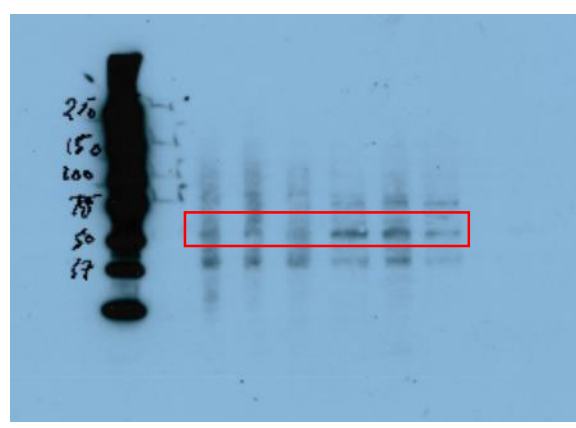

GAPDH

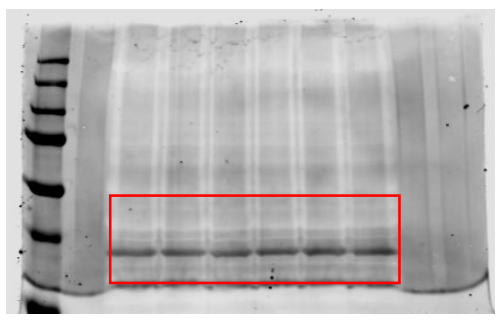

Full unedited gels for figure 7

Prelamin A

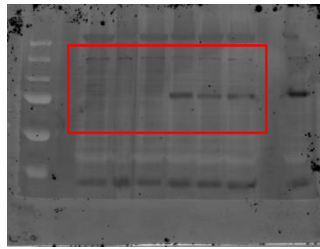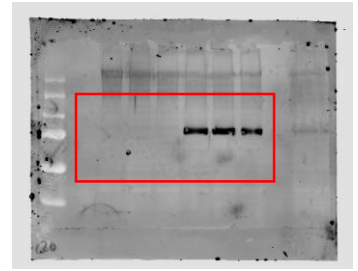

Lamin A/C

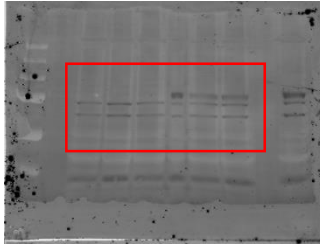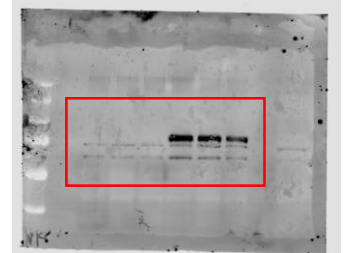

Emerin

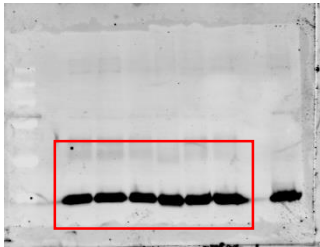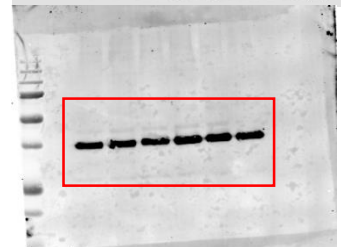

SUN2

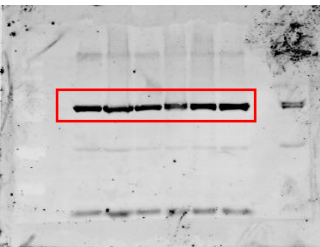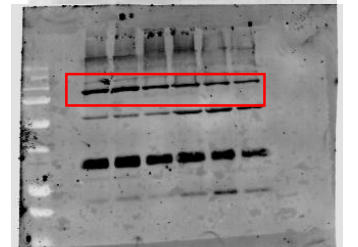

Nesprin 2

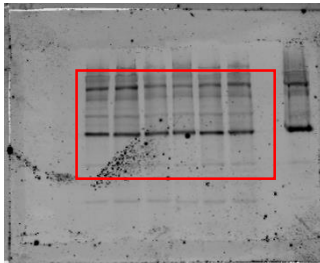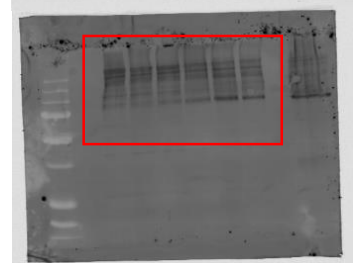

Desmin

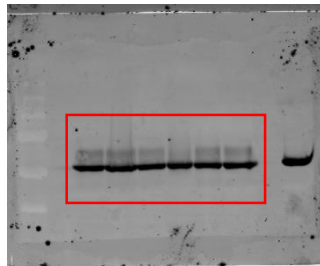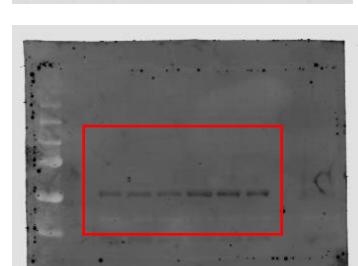

GAPDH

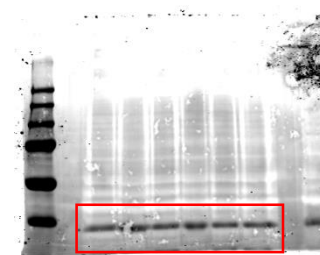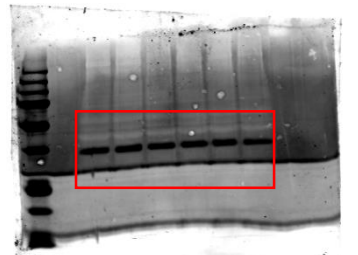

Full unedited gels for Figure 9

Prelamin A

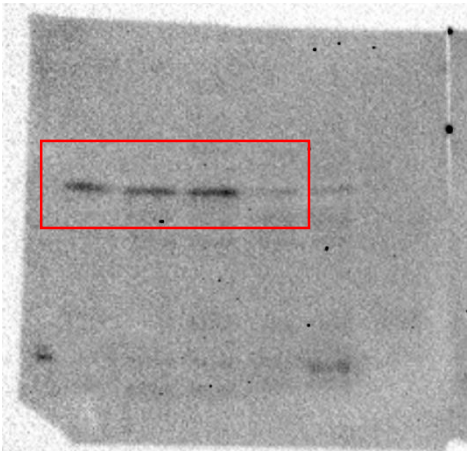

Ponceau S

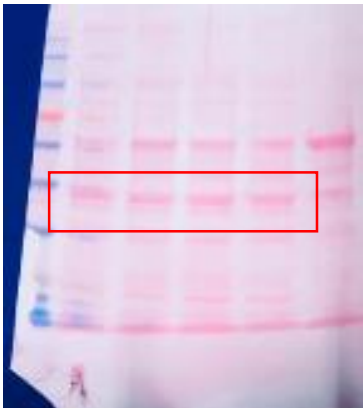

Supplement: sd1 [file 1]
